# Supplementary material
Source: PubMed Central journal article supplement (PMC4372000)
Supplement: pnas.201422096SI.pdf [file pnas.201422096SI.pdf]

# Supporting Information

Puglia et al. 10.1073/pnas.1422096112

## SI Methods and Materials

**Image Acquisition.** One hundred and seventy-six high-resolution T1-weighted anatomical images were first acquired using Siemens' magnetization-prepared rapid-acquired gradient echo pulse sequence with the following specifications: echo time (TE), 2.53 ms; repetition time (TR), 1,900 ms; flip angle (FA), 9°; field-of-view (FOV), 250 mm; image matrix, 256 mm × 256 mm; slice thickness, 1 mm. Whole-brain functional images were then acquired using a T2\*-weighted echo planar imaging sequence sensitive to BOLD contrast with the following specifications: TE, 40 ms; TR, 2,000 ms; FA, 90°; FOV, 192 mm; image matrix, 64 mm × 64 mm; slice thickness, 3.5 mm; slice gap, 22%—using 125 ( $n = 27$ ) or 130 ( $n = 71$ ) successive brain volumes of 28 slices coplanar with the anterior and posterior commissures. Stimuli were presented with Psychophysics Toolbox for MATLAB using an LCD AVOTEC projector onto a screen located behind the subject's head and viewed through an integrated head-coil mirror.

**Preprocessing.** Data preprocessing was carried out using FEAT (FMRI Expert Analysis Tool) Version 6.00, part of FSL (FMRIB's Software Library) (1). Motion was assessed by center of mass measurements (BXH/XCEDE Tools, version 1.8.16, Bioinformatics Information Research Network) to ensure that no participants had greater than a 3-mm deviation in the  $x$ ,  $y$ , or  $z$  dimensions. The following prestatistics processing was applied: motion correction using MCFLIRT (2), nonbrain removal using BET (3), spatial smoothing using a Gaussian kernel of 5.0 mm full width at half maximum to reduce noise, grand-mean intensity normalization of the entire 4D dataset by a single multiplicative factor, and high-pass temporal filtering (Gaussian-weighted least-squares straight line fitting, with sigma equal to 50.0 s). Additionally, each functional volume was registered to the participant's high-resolution anatomical image and then to FSL's standard Montreal Neurologic Institute (MNI 152, T1 2 mm) template brain using FSL's linear registration tool (2, 4).

1. Smith SM, et al. (2004) Advances in functional and structural MR image analysis and implementation as FSL. *Neuroimage* 23(Suppl 1):S208–S219.
2. Jenkinson M, Bannister P, Brady M, Smith S (2002) Improved optimization for the robust and accurate linear registration and motion correction of brain images. *Neuroimage* 17(2):825–841.

3. Smith SM (2002) Fast robust automated brain extraction. *Hum Brain Mapp* 17(3):143–155.
4. Jenkinson M, Smith S (2001) A global optimisation method for robust affine registration of brain images. *Med Image Anal* 5(2):143–156.

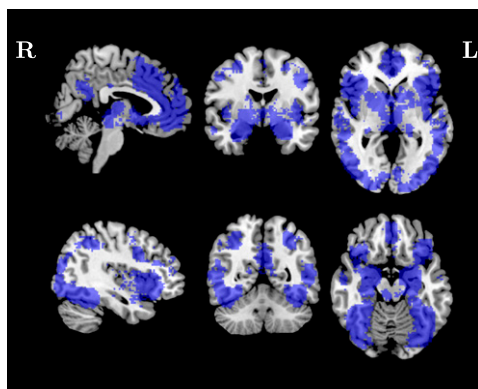

**Fig. S1.** Functional ROI search space created using [Neurosynth.org](http://Neurosynth.org) meta-analysis feature set keywords “face” and “emotion.” Image is depicted in MNI space (Top,  $x = 3$ ,  $y = -2$ ,  $z = 0$ ; Bottom,  $x = 38$ ,  $y = -54$ ,  $z = -16$ ).

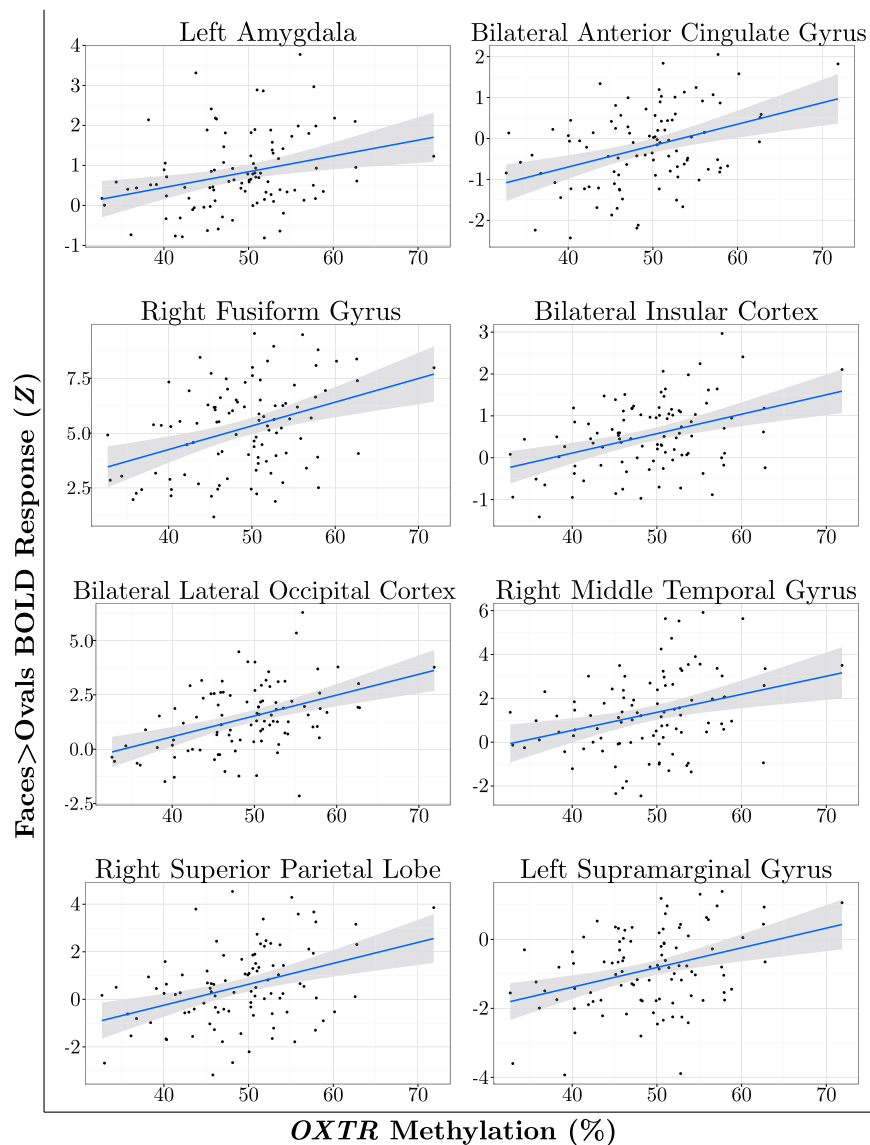

**Fig. S2.** Methylation of *OXTR* is associated with increases in brain response to angry and fearful faces. Mean Z statistic values from clusters of voxels within ROI show a significant positive main effect of methylation on BOLD response (extent threshold  $k \geq 10$  voxels) are plotted against percent *OXTR* methylation for each participant ( $n = 98$ ). Gray shading indicates 95% confidence interval around the best-fit line.



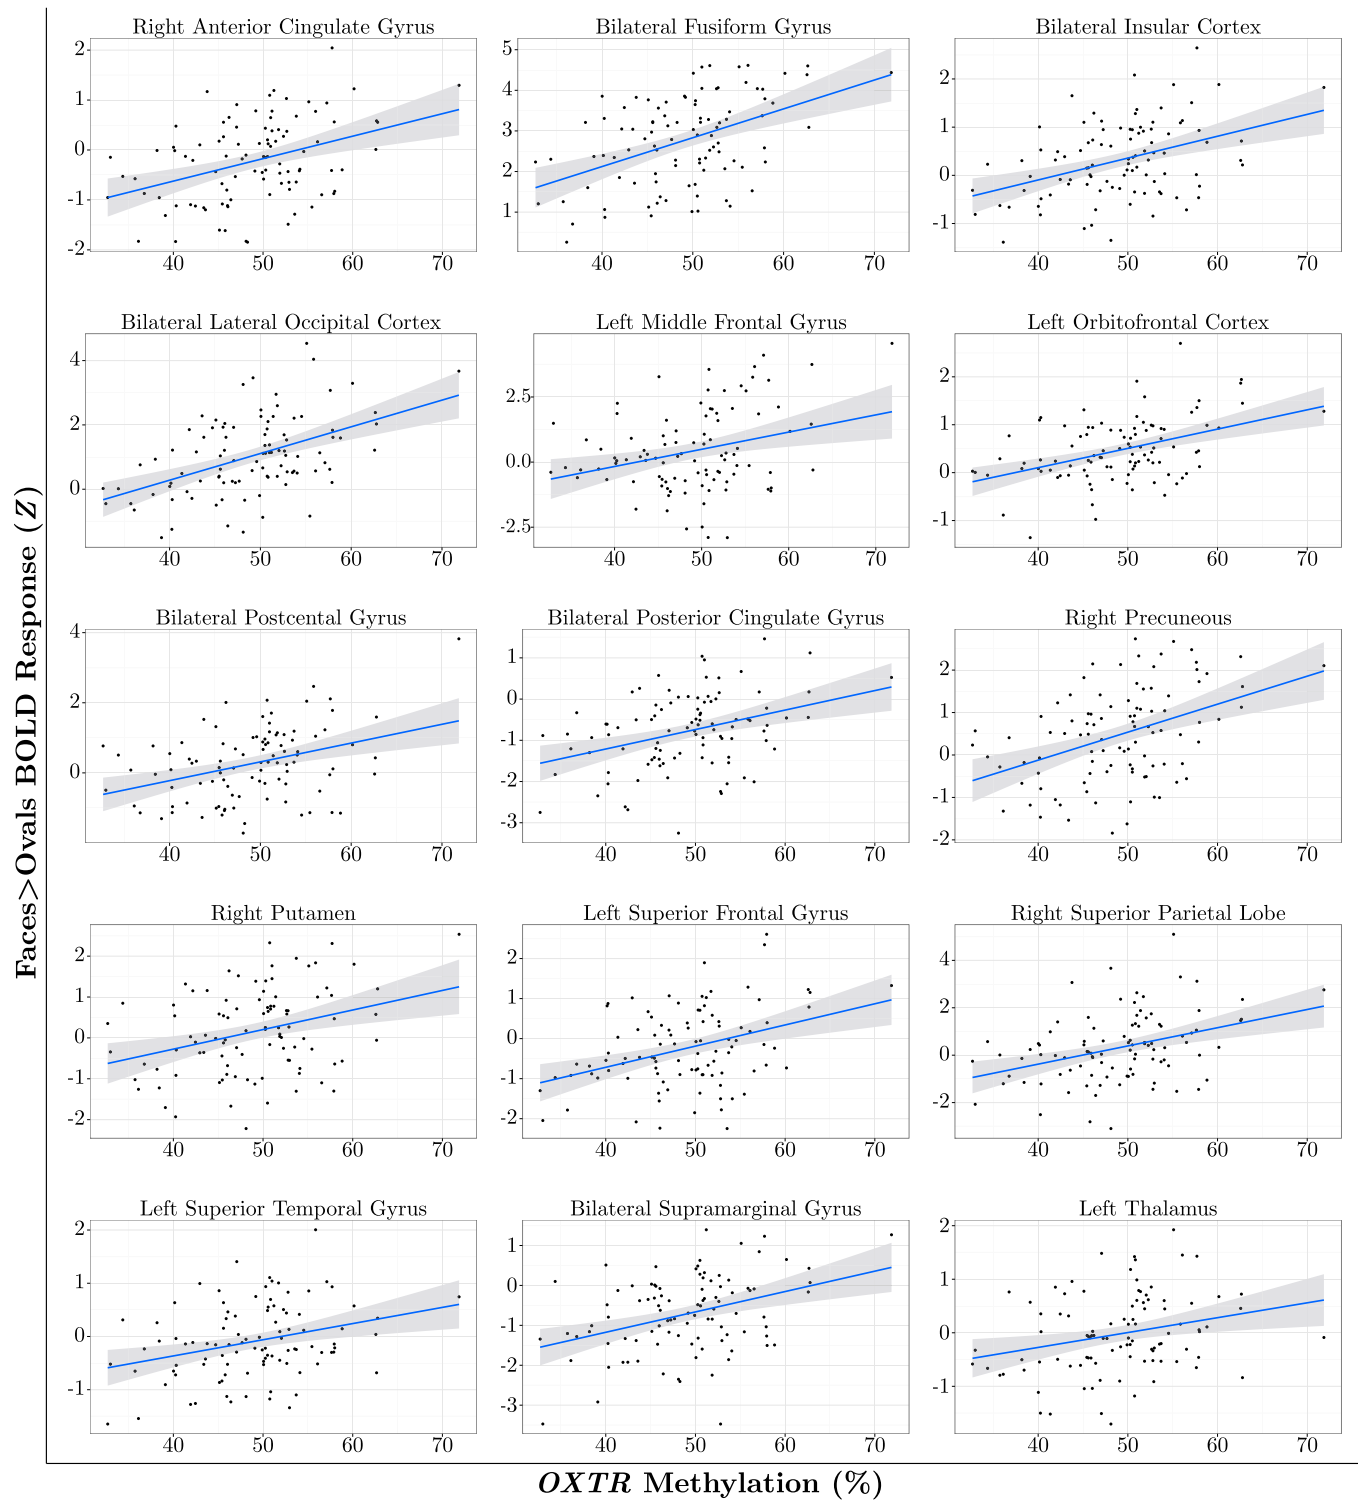

**Fig. S4.** Relationship between *OXTR* methylation and BOLD activity within areas identified in whole-brain analysis. Mean Z statistic values from clusters of voxels within whole-brain analysis showing a significant positive main effect of methylation on BOLD response (extent threshold  $k \geq 10$  voxels) are plotted against percent *OXTR* methylation for each participant ( $n = 98$ ). Gray shading indicates 95% confidence interval around the best-fit line.

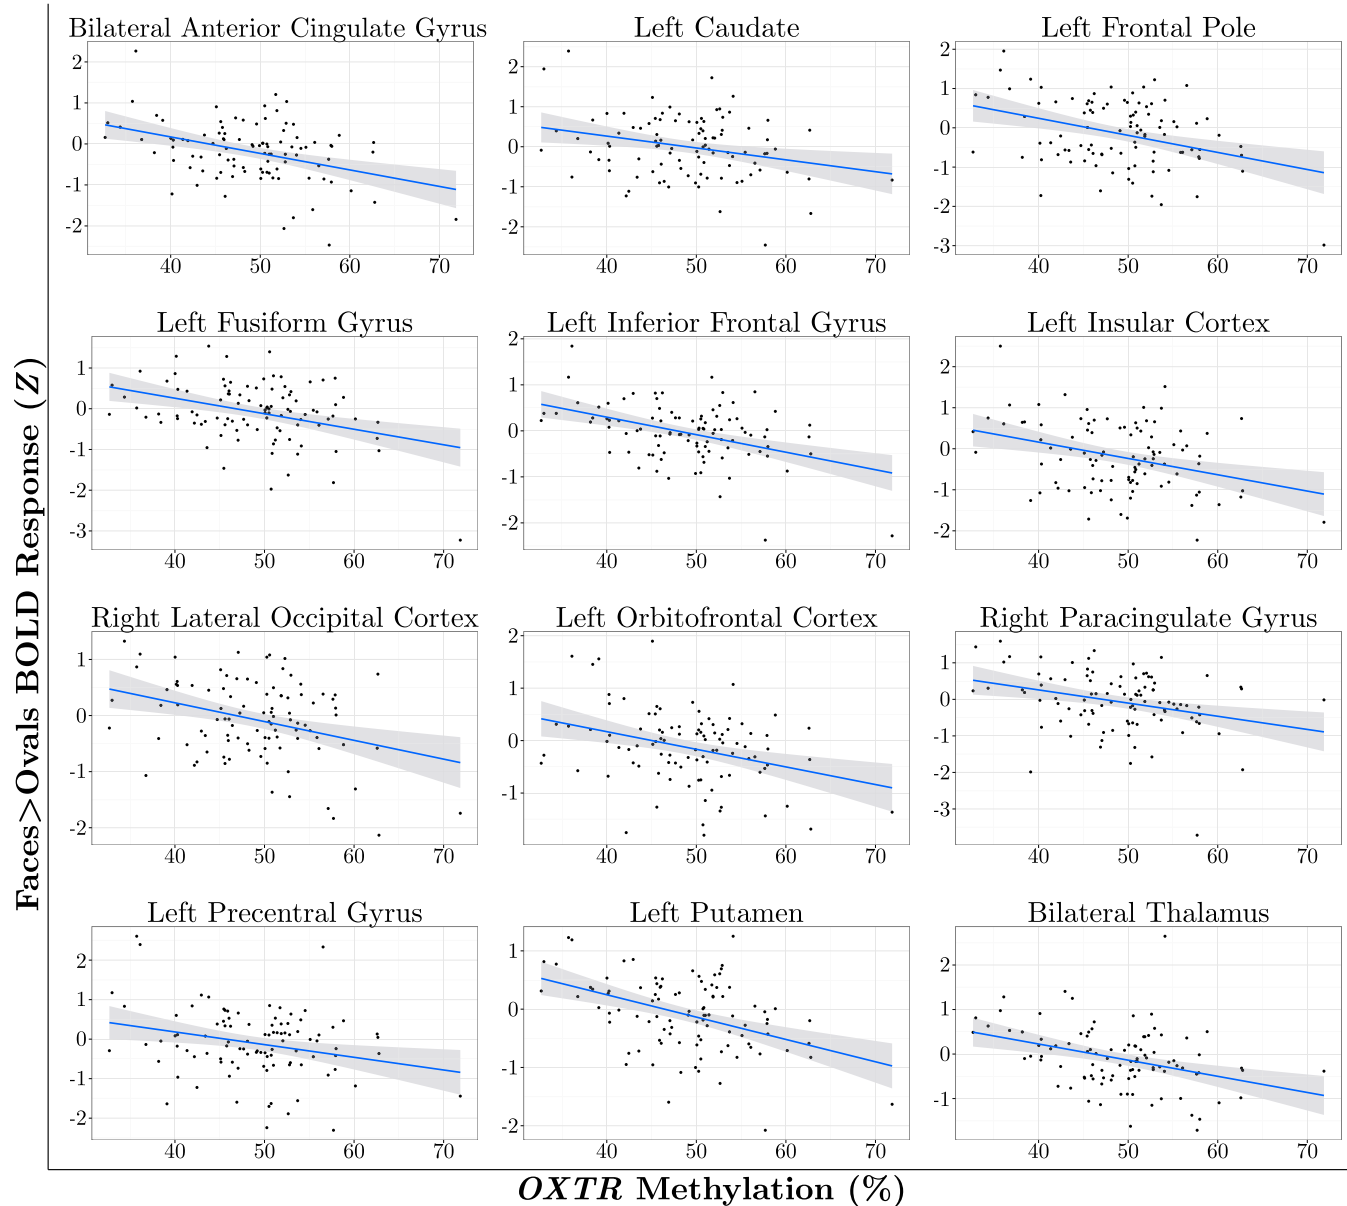

**Fig. S5.** Increased *OXTR* methylation attenuates amygdala connectivity with brain regions important for emotion regulation and face perception. Mean Z statistic values from clusters of voxels within ROI showing a significant negative main effect of methylation on right amygdala functional connectivity (extent threshold  $k \geq 10$  voxels) are plotted against percent *OXTR* methylation for each participant ( $n = 98$ ). Gray shading indicates 95% confidence interval around the best-fit line.

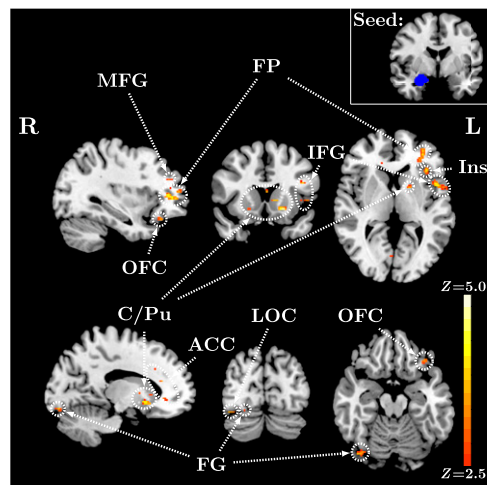

**Fig. S6.** Negative main effect of *OXTR* methylation on right amygdala functional connectivity within whole-brain analysis. Z statistic map of voxels showing a significant negative main effect of *OXTR* methylation on right amygdala functional connectivity for faces > ovals contrast within whole-brain analysis, FDR corrected at  $q < 0.05$ . Images are depicted in MNI space (*Top*,  $x = -36$ ,  $y = 16$ ,  $z = 4$ ; *Bottom*,  $x = -16$ ,  $y = -78$ ,  $z = -18$ ). (*Inset*) Right amygdala seed region ( $y = -4$ ). ACC, anterior cingulate cortex; C/Pu, caudate/putamen; FG, fusiform gyrus; FP, frontal pole; IFG, inferior frontal gyrus; Ins, insular cortex; LOC, lateral occipital cortex; MFG, medial frontal gyrus; OFC, orbitofrontal cortex.

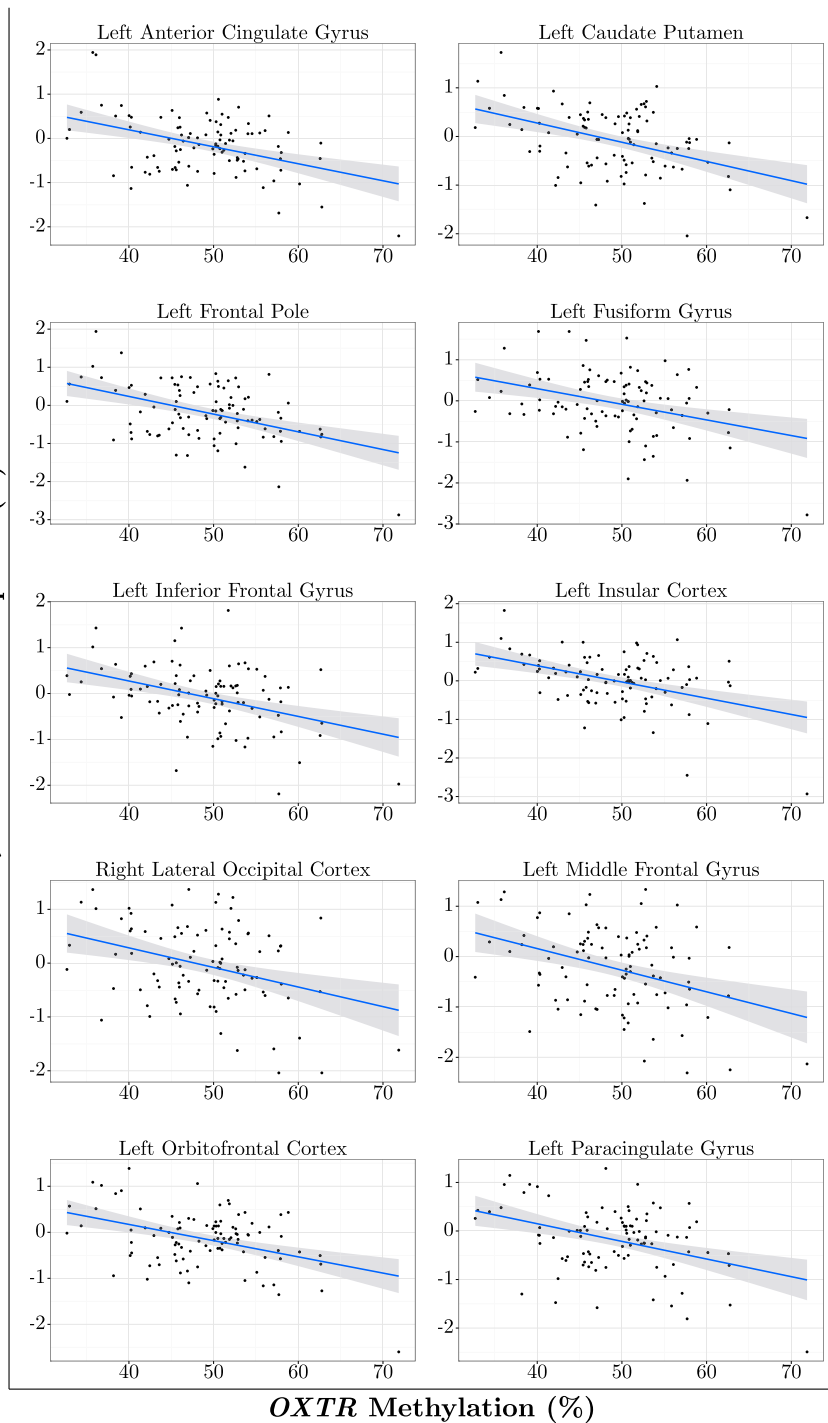

**Fig. S7.** Relationship between *OXTR* methylation and right amygdala functional connectivity within areas identified in PPI whole-brain analysis. Mean Z statistic values from clusters of voxels within whole-brain analysis showing a significant negative main effect of methylation on right amygdala functional connectivity (extent threshold  $k \geq 10$  voxels) are plotted against percent *OXTR* methylation for each participant ( $n = 98$ ). Gray shading indicates 95% confidence interval around the best-fit line.

**Table S1. Whole-brain analysis local maxima statistics**

| Anatomical region         | Hem | x   | y   | z   | Z    | k   |
|---------------------------|-----|-----|-----|-----|------|-----|
| Anterior cingulate gyrus  | R   | 6   | −6  | 38  | 4.93 | 413 |
| Fusiform gyrus            | L   | −36 | −10 | −40 | 4.36 | 17  |
| Fusiform gyrus            | R   | 38  | −60 | −16 | 3.63 | 12  |
| Insular cortex            | L   | −38 | 22  | −4  | 4.09 | 36  |
| Insular cortex            | R   | 40  | −18 | −8  | 4.36 | 46  |
| Insular cortex            | R   | 32  | 16  | 6   | 4.15 | 32  |
| Insular cortex            | R   | 34  | 10  | −6  | 4.06 | 27  |
| Lateral occipital cortex  | L   | −26 | −82 | 26  | 4.41 | 193 |
| Lateral occipital cortex  | R   | 34  | −78 | 26  | 4.86 | 265 |
| Lateral occipital cortex  | R   | 36  | −58 | 8   | 4.05 | 44  |
| Middle frontal gyrus      | L   | −42 | 36  | 20  | 3.69 | 11  |
| Orbitofrontal gyrus       | L   | −28 | 14  | −28 | 3.95 | 20  |
| Postcentral gyrus         | B   | 0   | −36 | 64  | 4.02 | 32  |
| Postcentral gyrus         | L   | −18 | −34 | 62  | 3.78 | 12  |
| Posterior cingulate gyrus | B   | 0   | −34 | 20  | 4.6  | 31  |
| Posterior cingulate gyrus | L   | −8  | −40 | 30  | 3.97 | 41  |
| Posterior cingulate gyrus | R   | 12  | −28 | 36  | 4.35 | 49  |
| Precuneous                | R   | 10  | −48 | 54  | 3.96 | 33  |
| Precuneous                | R   | 24  | −62 | 8   | 3.73 | 13  |
| Putamen                   | R   | 30  | −16 | 6   | 3.65 | 10  |
| Superior frontal gyrus    | L   | −14 | 12  | 58  | 3.82 | 19  |
| Superior parietal lobe    | R   | 24  | −52 | 56  | 3.74 | 47  |
| Superior temporal gyrus   | L   | −46 | −8  | −18 | 4.57 | 22  |
| Supramarginal gyrus       | L   | −62 | −32 | 36  | 4.29 | 60  |
| Supramarginal gyrus       | L   | −62 | −28 | 24  | 3.76 | 13  |
| Supramarginal gyrus       | R   | 64  | −24 | 30  | 4.16 | 26  |
| Thalamus                  | L   | −2  | −4  | 12  | 4.23 | 19  |

Significant cluster threshold:  $FDR(q) < 0.05$ ,  $k \geq 10$  voxels. B, bilateral; Hem, hemisphere; L, left; R, right; x, y, z, coordinates of local maxima in MNI space; Z, maximum Z statistic.

**Table S2. Whole-brain PPI analysis local maxima statistics**

| Anatomical region        | Hem | x   | y   | z   | Z    | k  |
|--------------------------|-----|-----|-----|-----|------|----|
| Anterior cingulate gyrus | L   | −20 | 32  | 18  | 4.26 | 20 |
| Caudate                  | L   | −12 | 16  | 2   | 4.35 | 11 |
| Frontal pole             | L   | −30 | 38  | 6   | 4.96 | 77 |
| Frontal pole             | L   | −34 | 52  | 12  | 4.16 | 13 |
| Fusiform gyrus           | L   | −16 | −88 | −14 | 4.37 | 17 |
| Inferior frontal gyrus   | L   | −52 | 8   | 4   | 4.56 | 44 |
| Insular cortex           | L   | −38 | 26  | 4   | 4.43 | 22 |
| Lateral occipital cortex | R   | 42  | −78 | −18 | 4.22 | 17 |
| Middle frontal gyrus     | L   | −30 | 32  | 30  | 4.62 | 31 |
| Orbitofrontal cortex     | L   | −22 | 26  | 0   | 4.27 | 12 |
| Orbitofrontal cortex     | L   | −36 | 32  | −20 | 4.23 | 16 |
| Paracingulate gyrus      | L   | −12 | 38  | −4  | 4.12 | 14 |
| Putamen                  | L   | −18 | 14  | −8  | 5.25 | 45 |
| Putamen                  | L   | −18 | 6   | 4   | 4.15 | 15 |

Significant cluster threshold:  $FDR(q) < 0.05$ ,  $k \geq 10$  voxels. Hem, hemisphere; L, left; R, right. x, y, z, coordinates of local maxima in MNI space; Z, maximum Z statistic.
